# Supplementary material for: Fabrication of transparent conducting films composed of In3+ doped CuS and their application in flexible electroluminescent devices
Source: Royal Society of Chemistry journal article supplement (doi:10.1039/c5tc01283j), 2015-01-01
Supplement: c5tc01283j1.pdf [file c5tc01283j1.pdf]

## Fabrication of transparent conducting films composed of In<sup>3+</sup> doped CuS and their application in flexible electroluminescent devices

Dinesh K. Patel<sup>a</sup>, Alexander Kamyshny<sup>a</sup>, Ariando<sup>b</sup>, Huang Zhen<sup>b</sup>, and Shlomo Magdassi<sup>a,\*</sup>

<sup>a</sup>Casali Center for Applied Chemistry, Institute of Chemistry, The Center for Nanoscience and Nanotechnology, The Hebrew University of Jerusalem, Jerusalem 9190401, Israel.

<sup>b</sup>NUSNNI-Nanocore & Department of Physics, National University of Singapore, 117411 Singapore.

*E-mail: magdassi@mail.huji.ac.il*

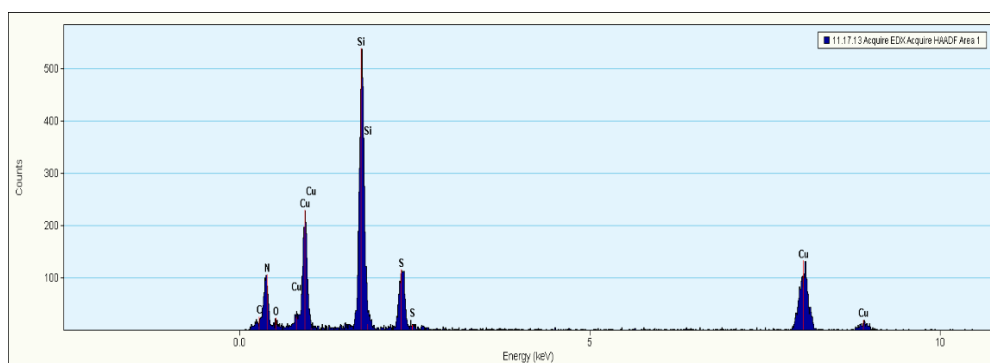

**Fig. S1** EDS pattern of undoped CuS on silicon grid coated with silicon nitride.

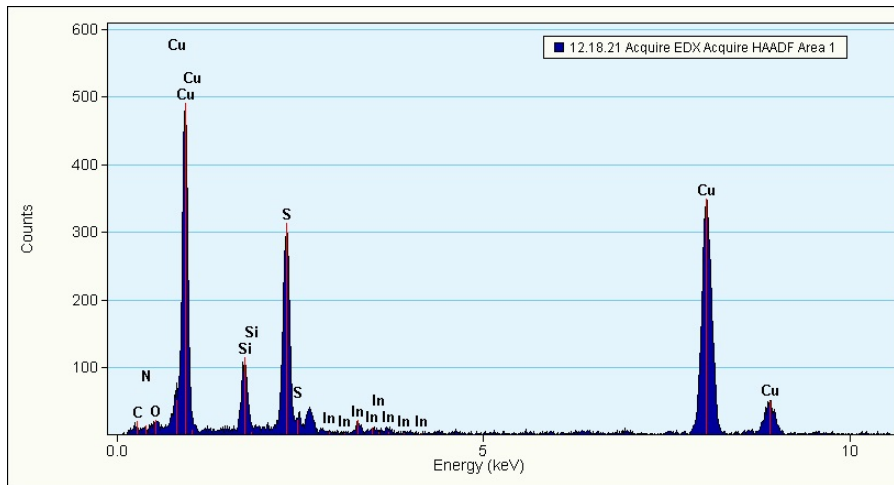

**Fig. S2** EDS of CuS films doped with 2.5 mol. %  $\text{In}^{3+}$  ions on silicon grid coated with silicon nitride.

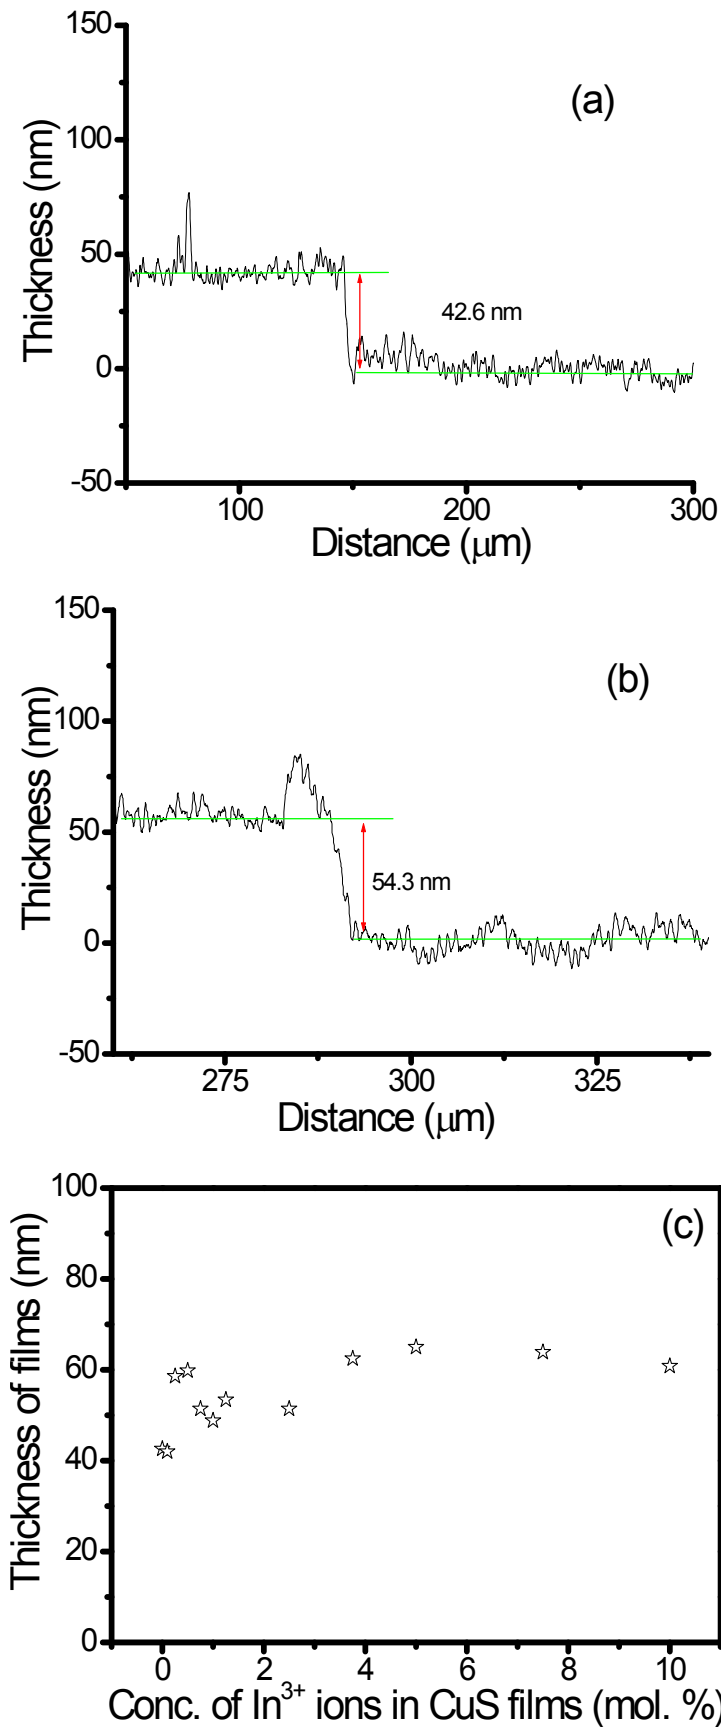

**Fig. S3** Profiles of  $\text{CuS}$  films doped with (a) 0 and (b) 1%  $\text{In}^{3+}$  ions (c) thickness of the films with varying concentration of  $\text{In}^{3+}$  ions with dipping time 24 hours.
